# Supplementary material for: NMR mapping of protein conformational landscapes using coordinated behavior of chemical shifts upon ligand binding
Source: Royal Society of Chemistry journal article supplement (doi:10.1039/c4cp00110a), 2014-01-01
Supplement: c4cp00110a1.pdf [file c4cp00110a1.pdf]

## SUPPORTING INFORMATION TO:

### NMR Mapping of Protein Conformational Landscapes using Coordinated Behavior of Chemical Shifts upon Ligand Binding

*Alessandro Cembran, Jonggul Kim, Jiali Gao, and Gianluigi Veglia*

**Figure S1:** Left Column: **Filtering** of the **synthetic data**. The residues were ordered by increasing  $SD_{PC1}/SD_{PC2}$  ratio (Black dots) and by increasing PC1 range (orange dots). Cutoffs are shown as horizontal lines. Right Column: scatterplots of the residues along the  $SD_{PC1}/SD_{PC2}$  ratio and the PC1 range. Only the residues on the top right quadrant are retained after filtering.

**Figure S2:** **Hierarchical clustering** analysis of the **synthetic data**. The square boxes show the clusters formed by cutting the tree at correlation of 0.99. The largest cluster is shown in blue.

**Figure S3:** Left Column: **Filtering** of the **data for PKA-C**. The residues were ordered by increasing  $SD_{PC1}/SD_{PC2}$  ratio (Black dots) and by increasing PC1 range (orange dots). Cutoffs are shown as horizontal lines. Right Column: scatterplots of the residues along the  $SD_{PC1}/SD_{PC2}$  ratio and the PC1 range. Only the residues on the top right quadrant are retained after filtering.

**Figure S4:** **Hierarchical clustering** analysis of the **data for PKA-C**. The square boxes show the clusters formed by cutting the tree at correlation of 0.99. The largest cluster is shown in blue.

**Table S1:** List of residues comprising the largest cluster of the PKA-C.

Figure S1

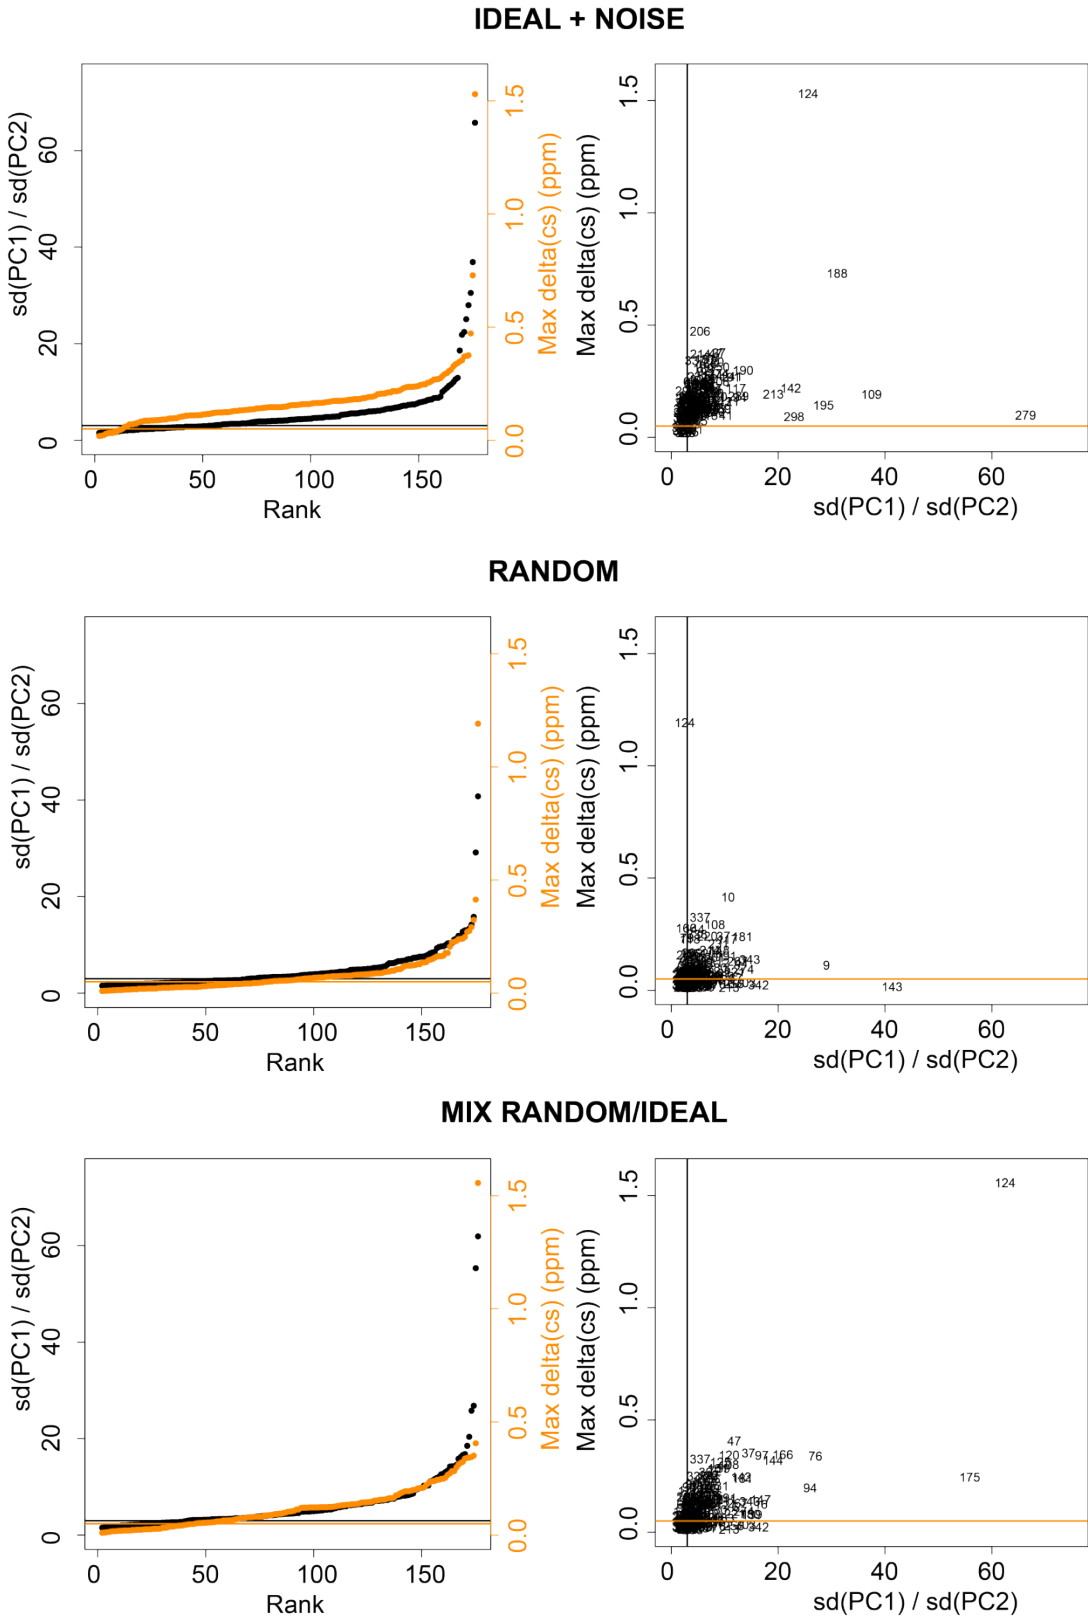

Figure S2

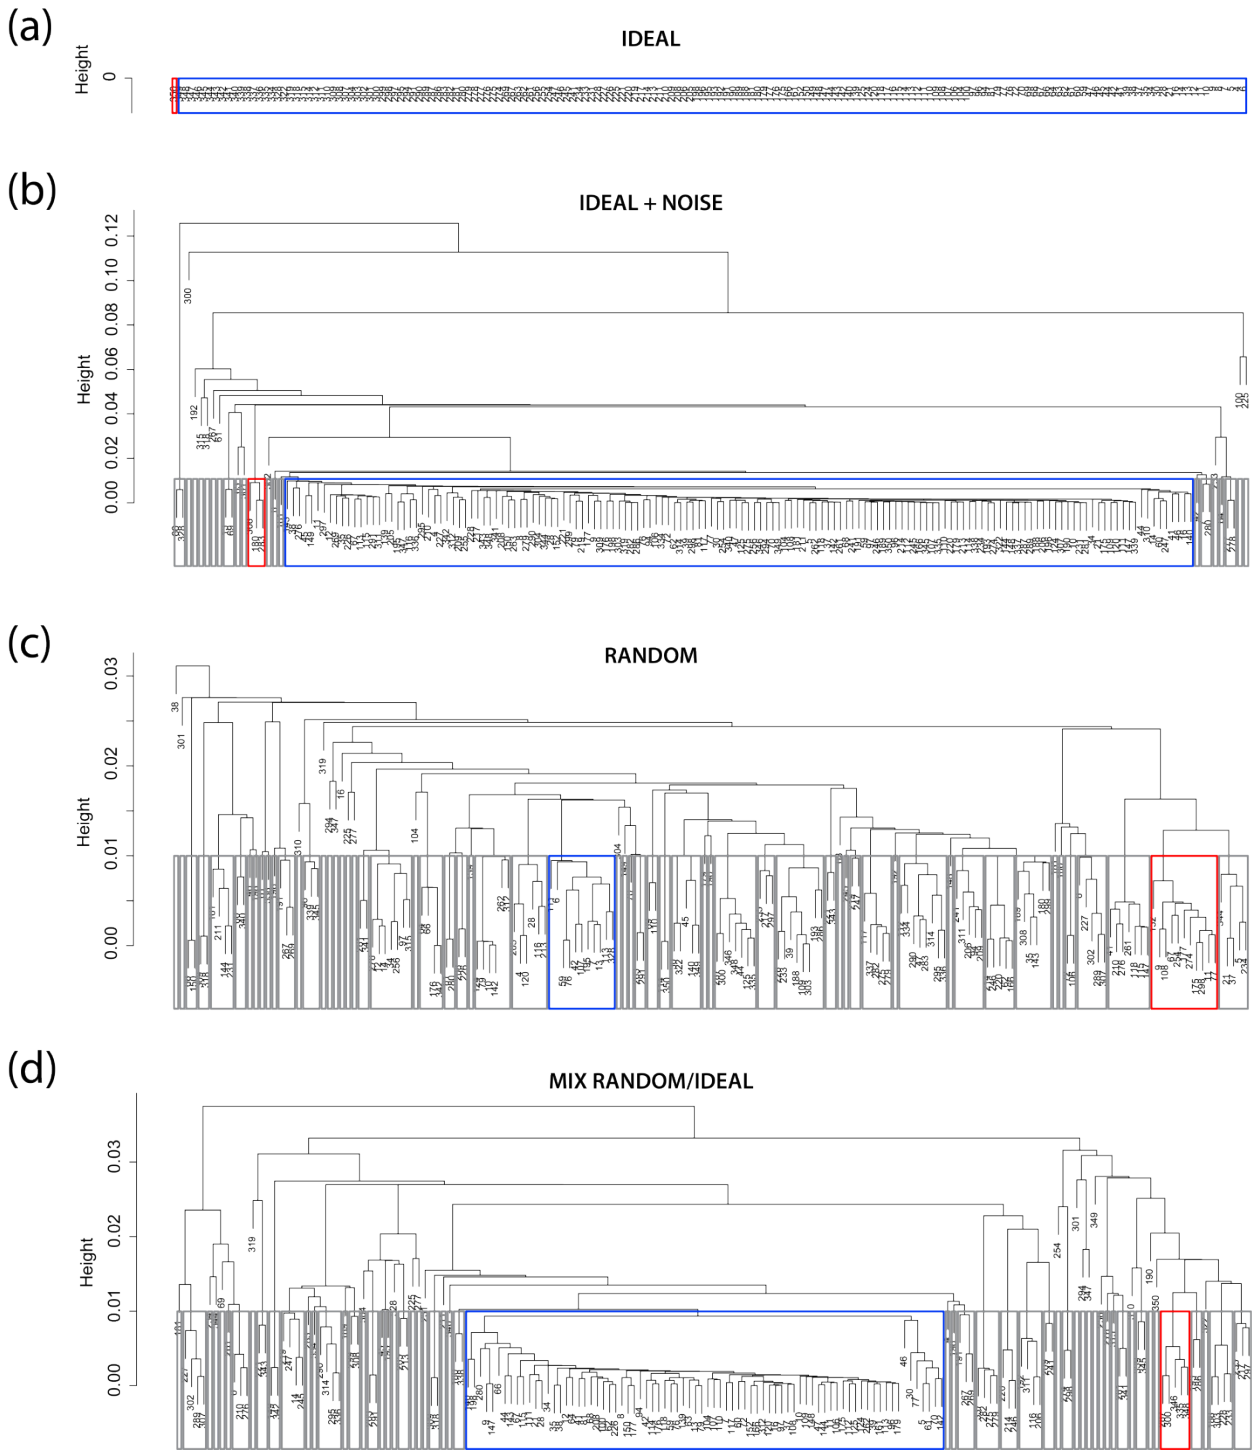

Figure S3

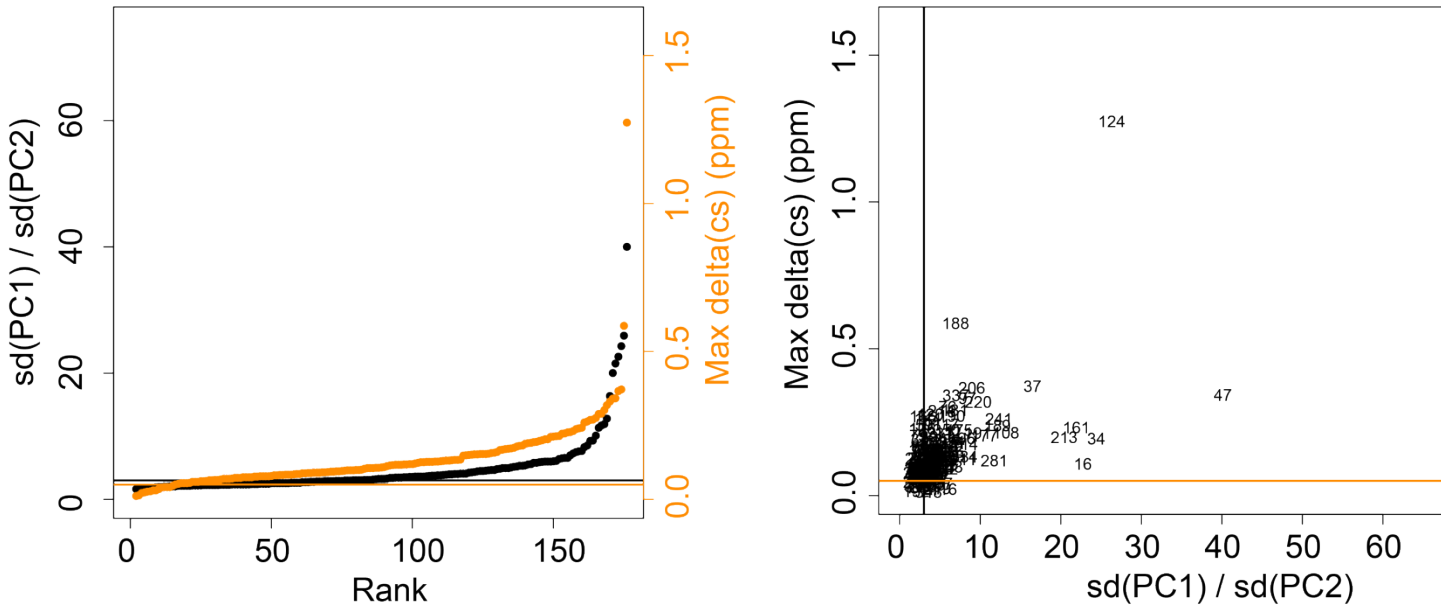

Figure S4

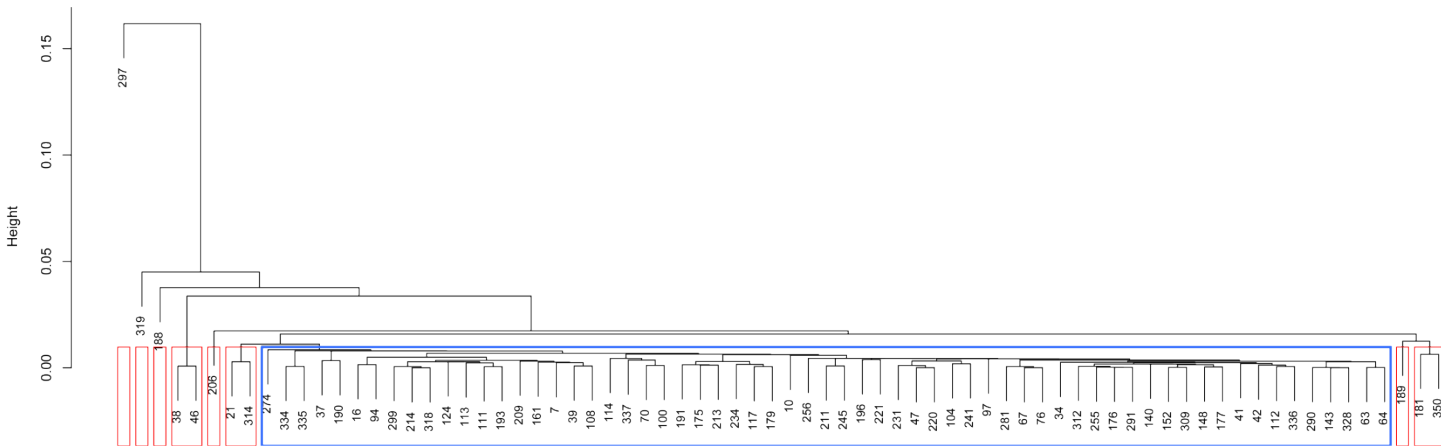

Table S1:

|       |       |       |
|-------|-------|-------|
| K 7   | N 113 | D 220 |
| S 10  | S 114 | W 221 |
| K 16  | Y 117 | M 231 |
| S 34  | A 124 | G 234 |
| T 37  | E 140 | D 241 |
| Q 39  | A 143 | Q 245 |
| D 41  | A 148 | V 255 |
| Q 42  | L 152 | R 256 |
| K 47  | D 161 | Q 274 |
| K 63  | D 175 | F 281 |
| E 64  | Q 176 | D 290 |
| N 67  | Q 177 | I 291 |
| A 70  | Y 179 | T 299 |
| K 76  | R 190 | K 309 |
| I 94  | V 191 | A 312 |
| A 97  | G 193 | F 318 |
| F 100 | W 196 | D 328 |
| V 104 | I 209 | E 334 |
| F 108 | L 211 | I 335 |
| K 111 | K 213 | R 336 |
| D 112 | G 214 | V 337 |
